# Supplementary material for: Comprehensive Analysis Identifies PI3K/Akt Pathway Alternations as an Immune-Related Prognostic Biomarker in Colon Adenocarcinoma Patients Receiving Immune Checkpoint Inhibitor Treatment
Source: Hindawi journal article supplement (doi:10.1155/2022/8179799), 2022-06-06
Supplement: f1 [file 8179799.f1.zip]

## Schedule 1: Solid Tumor Clinical 680 Genes Full List

*ABCB1*(NM\_000927)  
*ACTL6A*(NM\_004301)  
*ALDH2*(NM\_000690)  
*AREG*(NM\_001657)  
*ATR*(NM\_001184)  
*ABCC1*(NM\_004996)  
*ACVR1*(NM\_001105)  
*ALK*(NM\_004304)  
*ATRIP*(NM\_130384)  
*ARID1A*(NM\_006015)  
*ABCC11*(NM\_032583)  
*ADCY2*(NM\_020546)  
*ALOX12*(NM\_000697)  
*ARID1B*(NM\_020732)  
*ATRX*(NM\_000489)  
*ABCC2*(NM\_000392)  
*ADH1B*(NM\_000668)  
*AMER1*(NM\_152424)  
*ARID2*(NM\_152641)  
*AURKA*(NM\_003600)  
*ABCC4*(NM\_005845)  
*ADH1C*(NM\_000669)  
*ANXA5*(NM\_001154)  
*AURKB*(NM\_004217)  
*ARMS2*(NM\_001099667)  
*ABCC5*(NM\_005688)  
*AIP*(NM\_003977)  
*APC*(NM\_000038)  
*ASNS*(NM\_001673)  
*AXIN1*(NM\_003502)  
*ABCG1*(NM\_016818)  
*AXIN2*(NM\_004655)  
*APLF*(NM\_173545)  
*ASPH*(NM\_004318)  
*AKR1C3*(NM\_001253908)  
*ABCG2*(NM\_004827)  
*AKT1*(NM\_005163)  
*APOB*(NM\_000384)  
*ASXL1*(NM\_015338)  
*AXL*(NM\_001699)  
*ABL1*(NM\_005157)  
*AKT2*(NM\_001626)  
*AR*(NM\_000044)  
*ATM*(NM\_000051)  
*ACSS2*(NM\_018677)  
*AKT3*(NM\_181690)  
*ARAF*(NM\_001654)  
*ATP7B*(NM\_000053)  
*B2M*(NM\_004048)  
*BCL2L1*(NM\_138578)

*BCORL1*(NM\_021946)  
*BRCA1*(NM\_007294)  
*BRE*(NM\_004899)  
*BAP1*(NM\_004656)  
*BCL2L11*(NM\_138625)  
*BLM*(NM\_000057)  
*BRCA2*(NM\_000059)  
*BRIP1*(NM\_032043)  
*BARD1*(NM\_000465)  
*BCL6*(NM\_001706)  
*BMPR1A*(NM\_004329)  
*BRD2*(NM\_001113182)  
*BTB*(NM\_000061)  
*BCL2*(NM\_000633)  
*BCOR*(NM\_001123383)  
*BRAF*(NM\_004333)  
*BRD4*(NM\_058243)  
*BUB1*(NM\_004336)  
*C8orf34*(NM\_052958)  
*CCL18*(NM\_002988)  
*CDK8*(NM\_001260)  
*CLK2*(NM\_003993)  
*CXXC4*(NM\_025212)  
*CACNA1C*(NM\_000719)  
*CCND1*(NM\_053056)  
*CDKN1A*(NM\_078467)  
*CMPK1*(NM\_016308)  
*CYLD*(NM\_015247)  
*CADM2*(NM\_153184)  
*CCND2*(NM\_001759)  
*CDKN1B*(NM\_004064)  
*CYP19A1*(NM\_000103)  
*CNTNAP5*(NM\_130773)  
*CALR*(NM\_004343)  
*CCND3*(NM\_001760)  
*CDKN1C*(NM\_000076)  
*CREBBP*(NM\_004380)  
*CYP1A1*(NM\_000499)  
*CAMTA1*(NM\_015215)  
*CCNE1*(NM\_001238)  
*CDKN2A*(NM\_000077)  
*CRKL*(NM\_005207)  
*CYP1A2*(NM\_000761)  
*CAPN2*(NM\_001748)  
*CD274*(NM\_014143)  
*CDKN2B*(NM\_004936)  
*CRLF2*(NM\_022148)  
*CYP1B1*(NM\_000104)  
*CARD11*(NM\_032415)  
*CD74*(NM\_001025159)  
*CDKN2C*(NM\_001262)

*CSDE1* (NM\_001007553)  
*CYP2B6* (NM\_000767)  
*CASC8* (NR\_024393)  
*CD79A* (NM\_001783)  
*CEBPA* (NM\_004364)  
*CSF1R* (NM\_005211)  
*CYP2C19* (NM\_000769)  
*CASP7* (NM\_001227)  
*CD79B* (NM\_001039933)  
*CES1* (NM\_001025195)  
*CSF3R* (NM\_156039)  
*CYP2C8* (NM\_000770)  
*CASP8* (NM\_001228)  
*CDA* (NM\_001785)  
*CFD* (NM\_001928)  
*CSMD3* (NM\_052900)  
*CYP2C9* (NM\_000771)  
*CBFB* (NM\_001755)  
*CDC25C* (NM\_001790)  
*CFH* (NM\_000186)  
*CSNK1A1* (NM\_001892)  
*CYP2D6* (NM\_000106)  
*CBL* (NM\_005188)  
*CDC73* (NM\_024529)  
*CFTR* (NM\_000492)  
*CSNK2A1* (NM\_001895)  
*CYP2E1* (NM\_000773)  
*CBLB* (NM\_170662)  
*CDH1* (NM\_004360)  
*CHD4* (NM\_001273)  
*CTCF* (NM\_006565)  
*CYP3A4* (NM\_017460)  
*CBR1* (NM\_001757)  
*CDK12* (NM\_016507)  
*CHEK1* (NM\_001274)  
*CTNNA1* (NM\_001903)  
*CYP3A5* (NM\_000777)  
*CBR3* (NM\_001236)  
*CDK2* (NM\_001798)  
*CHEK2* (NM\_007194)  
*CTNNB1* (NM\_001904)  
*CCAT2* (NR\_109834)  
*CDK4* (NM\_000075)  
*FNTB* (NM\_002028.3)  
*CUL3* (NM\_003590)  
*CCDC6* (NM\_005436)  
*CDK6* (NM\_001259)  
*CIC* (NM\_015125)  
*CXCR4* (NM\_003467)  
*DAXX* (NM\_001141969)  
*DDR2* (NM\_006182)

*DHFR* (NM\_000791)  
*DNMT3A* (NM\_022552)  
*DSCAM* (NM\_001389)  
*DDB2* (NM\_000107)  
*DDX3X* (NM\_001356)  
*DICER1* (NM\_177438)  
*DOT1L* (NM\_032482)  
*DYNC2H1* (NM\_001080463)  
*DDIT3* (NM\_004083)  
*DDX51* (NM\_175066)  
*DNMT1* (NM\_001130823)  
*DPYD* (NM\_000110)  
*E2F7* (NM\_203394)  
*EML4* (NM\_019063)  
*EPHB1* (NM\_004441)  
*ERCC5* (NM\_000123)  
*ETV6* (NM\_001987)  
*ECT2L* (NM\_001077706)  
*ENOSF1* (NM\_017512)  
*EPHX1* (NM\_001136018)  
*ERCC6* (NM\_000124)  
*EWSR1* (NM\_005243)  
*EDN1* (NM\_001955)  
*EP300* (NM\_001429)  
*ERBB2* (NM\_004448)  
*EREG* (NM\_001432)  
*EXT1* (NM\_000127)  
*EED* (NM\_003797)  
*EPAS1* (NM\_001430)  
*ERBB3* (NM\_001982)  
*ERG* (NM\_182918)  
*EXT2* (NM\_000401)  
*EEF1A1* (NM\_001402)  
*EPCAM* (NM\_002354)  
*ERBB4* (NM\_001042599)  
*ERRFI1* (NM\_018948)  
*EZH2* (NM\_004456)  
*EGF* (NM\_001963)  
*EPHA2* (NM\_004431)  
*ERCC1* (NM\_001983)  
*ESR1* (NM\_000125)  
*EGFR* (NM\_005228)  
*EPHA3* (NM\_005233)  
*ERCC2* (NM\_000400)  
*ESR2* (NM\_001040275)  
*EIF3A* (NM\_003750)  
*EPHA5* (NM\_004439)  
*ERCC3* (NM\_000122)  
*ETV1* (NM\_004956)  
*ELAC2* (NM\_001165962)  
*EPHA7* (NM\_004440)

*ERCC4* (NM\_005236)  
*ETV4* (NM\_001986)  
*FAM175A* (NM\_139076)  
*FAT1* (NM\_005245)  
*FGF23* (NM\_020638)  
*FGFR2* (NM\_000141)  
*FOXA1* (NM\_004496)  
*FAM46C* (NM\_017709)  
*FBN3* (NM\_032447)  
*FGF3* (NM\_005247)  
*FGFR3* (NM\_000142)  
*FOXK2* (NM\_004514)  
*FANCA* (NM\_000135)  
*FBXW7* (NM\_018315)  
*FGF4* (NM\_002007)  
*FGFR4* (NM\_022963)  
*FOXL2* (NM\_023067)  
*FANCB* (NM\_001018113)  
*FCGR2A* (NM\_021642)  
*FGF5* (NM\_004464)  
*FH* (NM\_000143)  
*FOXM1* (NM\_021953)  
*FANCC* (NM\_000136)  
*FCGR3A* (NM\_001127593)  
*FGF6* (NM\_020996)  
*FLCN* (NM\_144997)  
*FOXP1* (NM\_032682)  
*FANCG* (NM\_004629)  
*FGF1* (NM\_000800)  
*FGF7* (NM\_002009)  
*FLT1* (NM\_002019)  
*FOXP2* (NM\_014491)  
*FANCI* (NM\_001113378)  
*FGF10* (NM\_004465)  
*FGF8* (NM\_006119)  
*FLT3* (NM\_004119)  
*FRS2* (NM\_006654)  
*FANCL* (NM\_018062)  
*FGF19* (NM\_005117)  
*FGF9* (NM\_002010)  
*FLT4* (NM\_182925)  
*FUBP1* (NM\_003902)  
*FANCM* (NM\_020937)  
*FGF2* (NM\_002006)  
*FGFR1* (NM\_023110)  
*FOLR3* (NM\_000804)  
*FUS* (NM\_004960)  
*GAB2* (NM\_080491)  
*GATA6* (NM\_005257)  
*GLIPR1* (NM\_006851)  
*GPB1* (NM\_001039966)

*GSK3B*(NM\_001146156)  
*GALNT12*(NM\_024642)  
*GEMIN6*(NM\_024775)  
*GLRX*(NM\_002064)  
*GPRIN2*(NM\_014696)  
*GSR*(NM\_000637)  
*GALNT14*(NM\_001253826) *GEN1*(NM\_182625)  
*GMEB1*(NM\_006582)  
*GPX5*(NM\_001509)  
*GSTA1*(NM\_145740)  
*GATA1*(NM\_002049)  
*GGH*(NM\_003878)  
*GNA11*(NM\_002067)  
*GREM1*(NM\_013372)  
*GSTM3*(NM\_000849)  
*GATA2*(NM\_032638)  
*GK5*(NM\_001039547)  
*GNAQ*(NM\_002072)  
*GRIN2A*(NM\_000833)  
*GSTP1*(NM\_000852)  
*GATA3*(NM\_001002295)  
*GLI1*(NM\_005269)  
*GNAS*(NM\_000516)  
*GRM1*(NM\_001278064)  
*H19*(NR\_002196)  
*HGF*(NM\_000601)  
*HLA-DPB1*(NM\_002121)  
*HNF1A*(NM\_000545)  
*HSD17B3*(NM\_000197)  
*H3F3A*(NM\_002107)  
*HIF1A*(NM\_001530)  
*HLA-DQB1*(NM\_002123)  
*HNF1B*(NM\_000458)  
*HSD3B2*(NM\_000198)  
*HDAC2*(NM\_001527)  
*HKDC1*(NM\_025130)  
*HLA-DRB1*(NM\_002124)  
*HOTAIR*(NR\_047517)  
*HSP90AA1*(NM\_005348)  
*HERC2*(NM\_004667)  
*HLA-A*(NM\_002116)  
*HLA-G*(NM\_002127)  
*HOXB13*(NM\_006361)  
*HSPA5*(NM\_005347)  
*HFE2*(NM\_145277)  
*HLA-B*(NM\_005514)  
*HMGA2*(NM\_003483)  
*HPSE2*(NM\_021828)  
*HTRA1*(NM\_002775)  
*HFM1*(NM\_001017975)  
*HLA-C*(NM\_002117)

*HMGCR*(NM\_000859)  
*HRAS*(NM\_005343)  
*IDH1*(NM\_005896)  
*IFNLR1*(NM\_170743)  
*IKZF1*(NM\_006060)  
*IL7R*(NM\_002185)  
*IRS2*(NM\_003749)  
*IDH2*(NM\_002168)  
*IGF1R*(NM\_000875)  
*IL13*(NM\_002188)  
*INHBA*(NM\_002192)  
*JAK1*(NM\_002227)  
*IFNGR1*(NM\_000416)  
*IGF2*(NM\_000612)  
*IL16*(NM\_001172128)  
*INPP4B*(NM\_003866)  
*JAK2*(NM\_004972)  
*IFNGR2*(NM\_005534)  
*IGFBP3*(NM\_001013398)  
*IL1B*(NM\_000576)  
*IRF1*(NM\_002198)  
*JAK3*(NM\_000215)  
*IFNL2*(NM\_172138)  
*IKBKE*(NM\_001193321)  
*IL23R*(NM\_144701)  
*IRF4*(NM\_001195286)  
*JUN*(NM\_002228)  
*KCNJ5*(NM\_000890)  
*KDR*(NM\_002253)  
*KIT*(NM\_000222)  
*KMT2A*(NM\_001197104)  
*KRAS*(NM\_004985)  
*KDM5A*(NM\_001042603) *KEAP1*(NM\_012289)  
*KLC1*(NM\_001130107)  
*KMT2B*(NM\_014727)  
*KRT14*(NM\_000526)  
*KDM5C*(NM\_004187)  
*KIF1B*(NM\_015074)  
*KLF4*(NM\_004235)  
*KMT2C*(NM\_170606)  
*KRT15*(NM\_002275)  
*KDM6A*(NM\_021140)  
*KIF5B*(NM\_004521)  
*KLLN*(NM\_001126049)  
*KMT2D*(NM\_003482)  
*KRT5*(NM\_000424)  
*LARP4*(NM\_052879)  
*LBR*(NM\_002296)  
*LIG3*(NM\_013975)  
*LRIG3*(NM\_153377)  
*LRP2*(NM\_004525)

*LATS1* (NM\_004690)  
*LGALS8* (NM\_006499)  
*LIG4* (NM\_002312)  
*LRMDA* (NM\_032024.3)  
*LYN* (NM\_002350)  
*LATS2* (NM\_014572)  
*LGR5* (NM\_003667)  
*LMO1* (NM\_002315)  
*LRP1B* (NM\_018557)  
*LZTR1* (NM\_006767)  
*MAD1L1* (NM\_003550)  
*MAPK3* (NM\_001040056)  
*MEN1* (NM\_000244)  
*MPL* (NM\_005373)  
*MUTYH* (NM\_001128425)  
*MALAT1* (NR\_002819)  
*MAPKBP1* (NM\_014994)  
*MET* (NM\_001127500)  
*MRE11A* (NM\_005590)  
*MYC* (NM\_002467)  
*MAP2K1* (NM\_002755)  
*MAX* (NM\_002382)  
*MGAT4A* (NM\_012214)  
*MSH2* (NM\_000251)  
*MYCL* (NM\_001033082)  
*MAP2K2* (NM\_030662)  
*MCL1* (NM\_021960)  
*MIR3936HG* (NR\_110997)  
*MSH3* (NM\_002439)  
*MYCN* (NM\_005378)  
*MAP2K4* (NM\_003010)  
*MDH2* (NM\_005918)  
*MIR4713HG* (NR\_146310)  
*MSH6* (NM\_000179)  
*MYD88* (NM\_001172567)  
*MAP3K1* (NM\_005921)  
*MDM2* (NM\_002392)  
*MITF* (NM\_000248)  
*MST1R* (NM\_001244937)  
*MYOD1* (NM\_002478)  
*MAP3K6* (NM\_004672)  
*MDM4* (NM\_002393)  
*MKI67* (NM\_002417)  
*MTHFR* (NM\_005957)  
*MAP4K4* (NM\_004834)  
*MED12* (NM\_005120)  
*MLH1* (NM\_000249)  
*MTOR* (NM\_004958)  
*MAPK1* (NM\_002745)  
*MEF2B* (NM\_005919)  
*MLH3* (NM\_001040108)



*MTUS1* (NM\_020749)  
*NAB2* (NM\_005967)  
*NF2* (NM\_000268)  
*NOTCH3* (NM\_000435)  
*NRAS* (NM\_002524)  
*NTRK3* (NM\_001007156)  
*NAT2* (NM\_000015)  
*NFE2L2* (NM\_006164)  
*NOVA1* (NM\_006491)  
*NRG1* (NM\_001159995)  
*NUP93* (NM\_014669)  
*NBN* (NM\_002485)  
*NFKBIA* (NM\_020529)  
*NPM1* (NM\_002520)  
*NSD1* (NM\_022455)  
*NUTM1* (NM\_175741)  
*NCOA1* (NM\_003743)  
*NKX2-1* (NM\_003317)  
*NQO1* (NM\_000903)  
*NT5C2* (NM\_012229)  
*OPRM1* (NM\_001008503)  
*NCOA3* (NM\_006534)  
*NOS3* (NM\_000603)  
*NQO2* (NM\_000904)  
*NTHL1* (NM\_002528)  
*OTOS* (NM\_148961)  
*NCOA4* (NM\_001145260) *NOTCH1* (NM\_017617)  
*NR1I2* (NM\_003889)  
*NTRK1* (NM\_002529)  
*NF1* (NM\_000267)  
*NOTCH2* (NM\_024408)  
*NR4A3* (NM\_006981)  
*NTRK2* (NM\_006180)  
*PAK1* (NM\_002576)  
*PCLO* (NM\_014510)  
*PIK3CG* (NM\_002649)  
*POR* (NM\_000941)  
*PRSS1* (NM\_002769)  
*PALB2* (NM\_024675)  
*PDCD1* (NM\_005018)  
*PIK3R1* (NM\_181523)  
*PPIB* (NM\_000942)  
*PSME2* (NM\_002818)  
*PALLD* (NM\_016081)  
*PDCD1LG2* (NM\_025239)  
*PIK3R2* (NM\_005027)  
*PPP2R1A* (NM\_014225)  
*PTCH1* (NM\_000264)  
*PAR3B* (NM\_057177)  
*PDGFB* (NM\_002608)  
*PIM1* (NM\_001243186)

*PPP2R2A* (NM\_002717)  
*PTCH2* (NM\_003738)  
*PARK2* (NM\_004562)  
*PDGFRA* (NM\_006206)  
*PLAUR* (NM\_002659)  
*PPP4R4* (NM\_058237)  
*PTEN* (NM\_000314)  
*PARK7* (NM\_007262)  
*PDGFRB* (NM\_002609)  
*PLCG2* (NM\_002661)  
*PRDM1* (NM\_001198)  
*PTGER4* (NM\_000958)  
*PARP1* (NM\_001618)  
*PDPK1* (NM\_002613)  
*PLIN2* (NM\_001122)  
*PRDX4* (NM\_006406)  
*PTGES* (NM\_004878)  
*PAX3* (NM\_000438)  
*PGR* (NM\_000926)  
*PMS1* (NM\_000534)  
*PREX2* (NM\_025170)  
*PTGS2* (NM\_000963)  
*PAX5* (NM\_016734)  
*PIAS4* (NM\_015897)  
*PMS2* (NM\_000535)  
*PRKACA* (NM\_002730)  
*PTN* (NM\_002825)  
*PAX7* (NM\_002584)  
*PIGB* (NM\_004855)  
*POLD1* (NM\_002691)  
*PRKACB* (NM\_182948)  
*PTPN11* (NM\_002834)  
*PAX8* (NM\_003466)  
*PIK3CA* (NM\_006218)  
*POLE* (NM\_006231)  
*PRKAR1A* (NM\_002734)  
*PTPRD* (NM\_001040712)  
*PBRM1* (NM\_018165)  
*PIK3CB* (NM\_006219)  
*POLH* (NM\_006502)  
*PRKCI* (NM\_002740)  
*PTPRT* (NM\_007050)  
*PCBP1* (NM\_006196)  
*PIK3CD* (NM\_005026)  
*POLQ* (NM\_199420)  
*PRKDC* (NM\_006904)  
*PZP* (NM\_002864)  
*RAC1* (NM\_018890)  
*RAF1* (NM\_002880)  
*RET* (NM\_020630)  
*RIF1* (NM\_001177663)

*RPS20*(NM\_001023)  
*RAD21*(NM\_006265)  
*RARA*(NM\_000964)  
*REV3L*(NM\_002912)  
*RILP*(NM\_031430)  
*RPS6KB1*(NM\_003161)  
*RAD50*(NM\_005732)  
*RB1*(NM\_000321)  
*RFC1*(NM\_002913)  
*RINT1*(NM\_021930)  
*RPTOR*(NM\_020761)  
*RAD51*(NM\_002875)  
*RBFOX1*(NM\_145891)  
*RFC4*(NM\_002916)  
*RIT1*(NM\_006912)  
*RRAS2*(NM\_001177314)  
*RAD51B*(NM\_002877)  
*RBM10*(NM\_005676)  
*RGS5*(NM\_003617)  
*RNASEL*(NM\_021133)  
*RRM1*(NM\_001033)  
*RAD51C*(NM\_058216)  
*RECK*(NM\_021111)  
*RHBDF2*(NM\_024599)  
*RNF43*(NM\_017763)  
*RSF1*(NM\_016578)  
*RAD51D*(NM\_002878)  
*RECQL*(NM\_002907)  
*RHEB*(NM\_005614)  
*ROBO2*(NM\_002942)  
*RUNX1*(NM\_001754)  
*RAD52*(NM\_134424)  
*RECQL4*(NM\_004260)  
*RHOA*(NM\_001664)  
*ROS1*(NM\_002944)  
*RAD54L*(NM\_003579)  
*REL*(NM\_002908)  
*RICTOR*(NM\_152756)  
*RPA4*(NM\_013347)  
*SBDS*(NM\_016038)  
*SETD2*(NM\_014159)  
*SLC22A5*(NM\_003060)  
*SMARCB1*(NM\_003073)  
*SRD5A2*(NM\_000348)  
*SCN10A*(NM\_006514)  
*SETD7*(NM\_030648)  
*SLC28A1*(NM\_004213)  
*SMO*(NM\_005631)  
*SRSF2*(NM\_003016)  
*SDHA*(NM\_004168)  
*SF3B1*(NM\_012433)

*SLC28A2*(NM\_004212)  
*SOCS1*(NM\_003745)  
*SS18*(NM\_001007559)  
*SDHAF2*(NM\_017841)  
*SH2B3*(NM\_005475)  
*SLC29A1*(NM\_004955.2)  
*SOCS6*(NM\_004232)  
*STAG2*(NM\_001042749)  
*SDHB*(NM\_003000)  
*SHMT1*(NM\_004169)  
*SLC31A1*(NM\_001859)  
*SOD2*(NM\_001024465)  
*STAT3*(NM\_139276)  
*SDHC*(NM\_003001)  
*SHOX*(NM\_000451)  
*SLC34A2*(NM\_006424)  
*SOX10*(NM\_006941)  
*STK11*(NM\_000455)  
*SDHD*(NM\_003002)  
*SHPRH*(NM\_173082)  
*SLCO1B1*(NM\_006446)  
*SOX2*(NM\_003106)  
*SUFU*(NM\_016169)  
*SELE*(NM\_000450)  
*SLC15A2*(NM\_021082)  
*SLCO1B3*(NM\_019844)  
*SOX4*(NM\_003107)  
*SULT1A1*(NM\_001055)  
*SELL*(NM\_000655)  
*SLC19A1*(NM\_030582)  
*SLX4*(NM\_032444)  
*SOX9*(NM\_000346)  
*SUZ12*(NM\_015355)  
*SEMA3C*(NM\_006379)  
*SLC22A1*(NM\_003057)  
*SMAD2*(NM\_005901)  
*SPEN*(NM\_015001)  
*SWI5*(NM\_001040011)  
*SERPINB3*(NM\_006919)  
*SLC22A16*(NM\_033125)  
*SMAD3*(NM\_005902)  
*SPINK1*(NM\_003122)  
*SYK*(NM\_001135052)  
*SERPINB4*(NM\_002974)  
*SLC22A2*(NM\_003058)  
*SMAD4*(NM\_005359)  
*SPOP*(NM\_003563)  
*SYNE1*(NM\_033071)  
*SETBP1*(NM\_015559)  
*SLC22A4*(NM\_003059)  
*SMARCA4*(NM\_001128849) *SRC*(NM\_198291)

*TACSTD2*(NM\_002353)  
*TFE3*(NM\_006521)  
*TNFRSF11B*(NM\_002546) *TP53*(NM\_000546)  
*TSC2*(NM\_000548)  
*TBX3*(NM\_005996)  
*TGFB1*(NM\_000660)  
*TNFRSF14*(NM\_003820)  
*TP53BP1*(NM\_001141979) *TSHR*(NM\_000369)  
*TCEB1*(NM\_005648)  
*TGFBR2*(NM\_001024847)  
*TNFRSF19*(NM\_018647)  
*TPMT*(NM\_000367)  
*TSPAN31*(NM\_005981)  
*TERC*(NR\_001566)  
*TMEM127*(NM\_017849)  
*TNFSF11*(NM\_033012)  
*TRAF1*(NM\_005658)  
*TTK*(NM\_001166691)  
*TERT*(NM\_198253)  
*TMPRSS2*(NM\_001135099) *TNFSF8*(NM\_001244)  
*TRAM2-AS1*(NR\_103446) *TUBB1*(NM\_030773)  
*TET1*(NM\_030625)  
*TNF*(NM\_000594)  
*TOP1*(NM\_003286)  
*TREX2*(NM\_080701)  
*TYMS*(NM\_001071)  
*TET2*(NM\_017628)  
*TNFAIP3*(NM\_006290)  
*TOP2A*(NM\_001067)  
*TSC1*(NM\_000368)  
*U2AF1*(NM\_006758)  
*UBE2A*(NM\_003336)  
*UBE2I*(NM\_003345)  
*UBE2V2*(NM\_003350)  
*UGT1A1*(NM\_000463)  
*UGT1A4*(NM\_007120)  
*UGT1A6*(NM\_001072)  
*UGT1A9*(NM\_021027)  
*VEGFA*(NM\_001025366)  
*VEGFC*(NM\_005429)  
*VHL*(NM\_000551)  
*WAS*(NM\_000377)  
*WIF1*(NM\_007191)  
*WNK2*(NM\_006648)  
*WNT5B*(NM\_032642)  
*WRN*(NM\_000553)  
*WT1*(NM\_024426)  
*XBP1*(NM\_005080)  
*XPA*(NM\_000380)  
*XPC*(NM\_004628)  
*XPO1*(NM\_003400)

*XRCC1*(NM\_006297)  
*XRCC2*(NM\_005431)  
*XRCC4*(NM\_022406)  
*YAP1* (NM\_006106)  
*YES1* (NM\_005433)  
*ZBTB16*(NM\_006006)  
*ZNF367*(NM\_153695)  
*ZNF423*(NM\_001271620)  
*ZNF750*(NM\_024702)  
*ZRSR2*(NM\_005089)

Note: The detection range covers the entire coding region of 528 genes and the adjacent introns  $\pm$  20bp, and part of the region of 152 genes. Gene names followed the rules of the HUGO Gene Nomenclature Committee (HGNC); gene transcripts were selected using the Locus Reference Genomic.

#### Schedule 2: List of fusion genes

*ALK*(NM\_004304)  
*FGFR1* (NM\_023110)  
*NAB2*(NM\_005967)  
*NTRK3*(NM\_001007156)  
*RARA* (NM\_000964)  
*BRAF*(NM\_004333)  
*FGFR2* (NM\_000141)  
*NCOA4*(NM\_001145260)  
*NUTM1* (NM\_175741)  
*RET*(NM\_020630)  
*CCDC6*(NM\_005436)  
*FGFR3*(NM\_000142)  
*NPM1* (NM\_002520)  
*PAX3*(NM\_000438)  
*ROS1*(NM\_002944)  
*CD74*(NM\_001025159)  
*FUS*(NM\_004960)  
*NR4A3*(NM\_006981)  
*PAX7*(NM\_002584)  
*SLC34A2*(NM\_006424)  
*DDIT3*(NM\_004083)  
*KIF5B*(NM\_004521)  
*NRG1* (NM\_001159995)  
*PAX8*(NM\_003466)  
*SS18*(NM\_001007559)  
*EML4*(NM\_019063)  
*KMT2A*(NM\_001197104)  
*NTRK1*(NM\_002529)  
*PDGFB*(NM\_002608)  
*TFE3*(NM\_006521)  
*EWSR1*(NM\_005243)  
*MYC*(NM\_002467)

*NTRK2*(NM\_006180)  
*PRKACA*(NM\_002730)  
*TMPRSS2*(NM\_001135099)

Note: The fusion gene covers the entire coding region and the fusion intron region, and some genes cover the fusion partner fusion intron region.

### Schedule 3 List of hereditary tumor-related genes

*AIP*(NM\_003977)  
*CDKN2A*(NM\_000077)  
*HOXB13*(NM\_006361)  
*POLD1*(NM\_002691)  
*SDHB*(NM\_003000)  
*ALK*(NM\_004304)  
*CFTR*(NM\_000492)  
*MAX*(NM\_002382)  
*POLE*(NM\_006231)  
*SDHC*(NM\_003001)  
*APC*(NM\_000038)  
*CHEK2*(NM\_007194)  
*MDH2*(NM\_005918)  
*PRKAR1A*(NM\_002734)  
*SDHD*(NM\_003002)  
*ATM*(NM\_000051)  
*CTNNA1*(NM\_001903)  
*MEN1*(NM\_000244)  
*PRSS1*(NM\_002769)  
*SLX4*(NM\_032444)  
*ATR*(NM\_001184)  
*DICER1*(NM\_177438)  
*MET*(NM\_001127500)  
*PTCH1*(NM\_000264)  
*SMAD4*(NM\_005359)  
*AXIN2*(NM\_004655)  
*EPAS1*(NM\_001430)  
*MLH1*(NM\_000249)  
*PTEN*(NM\_000314)  
*SMARCA4*(NM\_001128849)  
*BAP1*(NM\_004656)  
*EPCAM*(NM\_002354)  
*MLH3*(NM\_001040108)  
*RAD50*(NM\_005732)  
*SMARCB1*(NM\_003073)  
*BARD1*(NM\_000465)  
*EXT1*(NM\_000127)  
*MRE11A*(NM\_005590)  
*RAD51C*(NM\_058216)  
*SPINK1*(NM\_003122)  
*BLM*(NM\_000057)  
*EXT2*(NM\_000401)

*MSH2*(NM\_000251)  
*RAD51D*(NM\_002878)  
*STK11*(NM\_000455)  
*BMPR1A*(NM\_004329)  
*FAM175A*(NM\_139076)  
*MSH3*(NM\_002439)  
*RB1*(NM\_000321)  
*SUFU*(NM\_016169)  
*BRCA1*(NM\_007294)  
*FANCA*(NM\_000135)  
*MSH6*(NM\_000179)  
*RECQL4*(NM\_004260)  
*TERT*(NM\_198253)  
*BRCA2*(NM\_000059)  
*FANCC*(NM\_000136)  
*MUTYH*(NM\_001128425)  
*RET*(NM\_020630)  
*TMEM127*(NM\_017849)  
*BRIP1*(NM\_032043)  
*FANCG*(NM\_004629)  
*NBN*(NM\_002485)  
*RHBDF2*(NM\_024599)  
*TP53*(NM\_000546)  
*CDC73*(NM\_024529)  
*FH*(NM\_000143)  
*NF1*(NM\_000267)  
*RINT1*(NM\_021930)  
*TSC1*(NM\_000368)  
*CDH1*(NM\_004360)  
*FLCN*(NM\_144997)  
*NF2*(NM\_000268)  
*RNF43*(NM\_017763)  
*TSC2*(NM\_000548)  
*CDK12*(NM\_016507)  
*GALNT12*(NM\_024642)  
*NTHL1*(NM\_002528)  
*RPS20*(NM\_001023)  
*VHL*(NM\_000551)  
*CDK4*(NM\_000075)  
*GEN1*(NM\_182625)  
*PALB2*(NM\_024675)  
*SDHA*(NM\_004168)  
*XRCC2*(NM\_005431)  
*CDKN1B*(NM\_004064)  
*GREM1*(NM\_013372)  
*PMS2*(NM\_000535)  
*SDHAF2*(NM\_017841)



Note: The detection of hereditary tumor-related genes covers the entire coding region and adjacent introns  $\pm$  20bp, and also covers 387 related databases that have reported possible pathogenic intron and regulatory region mutations.

#### Schedule 4 List of DNA Damage Repair (DDR) Related Genes

##### Homologous recombination repair (HRR) pathway related genes

*ATM*(NM\_000051)  
*CHEK1*(NM\_001274)  
*FANCI*(NM\_001113378)  
*PALB2*(NM\_024675)  
*RAD52*(NM\_134424)  
*ATR*(NM\_001184)  
*CHEK2*(NM\_007194)  
*FANCL*(NM\_018062)  
*RAD50*(NM\_005732)  
*RAD54L*(NM\_003579)  
*BRCA1*(NM\_007294)  
*FANCA*(NM\_000135)  
*FANCM*(NM\_020937)  
*RAD51*(NM\_002875)  
*BARD1*(NM\_000465)  
*BRCA2*(NM\_000059)  
*FANCB*(NM\_001018113)  
*GEN1*(NM\_182625)  
*RAD51B*(NM\_002877)  
*BRIP1*(NM\_032043)  
*FANCC*(NM\_000136)  
*MRE11A*(NM\_005590)  
*RAD51C*(NM\_058216)  
*CDK12*(NM\_016507)  
*FANCG*(NM\_004629)  
*NBN*(NM\_002485)  
*RAD51D*(NM\_002878)

##### DNA mismatch repair (MMR) pathway related genes

*MLH1*(NM\_000249)  
*MLH3*(NM\_001040108)  
*MSH2*(NM\_000251)  
*MSH3*(NM\_002439)  
*MSH6*(NM\_000179)  
*PMS1*(NM\_000534)  
*PMS2*(NM\_000535)

##### Nucleotide excision repair (NER) pathway related genes

*ERCC1*(NM\_001983)  
*ERCC2*(NM\_000400)  
*ERCC3*(NM\_000122)  
*ERCC4*(NM\_005236)  
*ERCC5*(NM\_000123)  
*ERCC6*(NM\_000124)

#### Other DNA damage repair (DDR) related genes

*ATRIP*(NM\_130384)  
*MUTYH*(NM\_001128425)  
*PRKDC*(NM\_006904)  
*RPA4*(NM\_013347)  
*UBE2A*(NM\_003336)  
*BLM*(NM\_000057)  
*PARP1*(NM\_001618)  
*RECQL*(NM\_002907)  
*SHPRH*(NM\_173082)  
*UBE2V2*(NM\_003350)  
*CLK2*(NM\_003993)  
*POLD1*(NM\_002691)  
*RECQL4*(NM\_004260)  
*TP53*(NM\_000546)  
*WRN*(NM\_000553)  
*IDH1*(NM\_005896)  
*POLE*(NM\_006231)  
*REV3L*(NM\_002912)  
*TP53BP1*(NM\_001141979)  
*PTEN*(NM\_000314)  
*LIG4*(NM\_002312)  
*POLQ*(NM\_199420)  
*RIF1*(NM\_001177663)  
*TREX2*(NM\_080701)  
*STAG2*(NM\_001042749)

Note: DDR: DNA damage response; HRR:  
Homologous Recombination Repair ;MMR: DNA  
mismatch repair; NER:  
Nucleotide excision repair.

## Schedule 2: List of fusion genes

*ALK*(NM\_004304)  
*FGFR1*(NM\_023110)  
*NAB2*(NM\_005967)  
*NTRK3*(NM\_001007156)  
*RARA*(NM\_000964)  
*BRAF*(NM\_004333)  
*FGFR2*(NM\_000141)  
*NCOA4*(NM\_001145260)  
*NUTM1*(NM\_175741)  
*RET*(NM\_020630)  
*CCDC6*(NM\_005436)  
*FGFR3*(NM\_000142)  
*NPM1*(NM\_002520)  
*PAX3*(NM\_000438)  
*ROS1*(NM\_002944)  
*CD74*(NM\_001025159)  
*FUS*(NM\_004960)  
*NR4A3*(NM\_006981)  
*PAX7*(NM\_002584)  
*SLC34A2*(NM\_006424)  
*DDIT3*(NM\_004083)  
*KIF5B*(NM\_004521)  
*NRG1*(NM\_001159995)  
*PAX8*(NM\_003466)  
*SS18*(NM\_001007559)  
*EML4*(NM\_019063)  
*KMT2A*(NM\_001197104)  
*NTRK1*(NM\_002529)  
*PDGFB*(NM\_002608)  
*TFE3*(NM\_006521)  
*EWSR1*(NM\_005243)  
*MYC*(NM\_002467)  
*NTRK2*(NM\_006180)  
*PRKACA*(NM\_002730)  
*TMPRSS2*(NM\_001135099)

Note: The fusion gene covers the entire coding region and the fusion intron region, and some genes c

over the fusion partner fusion intron region.

### Schedule 3 List of hereditary tumor-related genes

*AIP*(NM\_003977)  
*CDKN2A*(NM\_000077)  
*HOXB13*(NM\_006361)  
*POLD1*(NM\_002691)  
*SDHB*(NM\_003000)  
*ALK*(NM\_004304)  
*CFTR*(NM\_000492)  
*MAX*(NM\_002382)  
*POLE*(NM\_006231)  
*SDHC*(NM\_003001)  
*APC*(NM\_000038)  
*CHEK2*(NM\_007194)  
*MDH2*(NM\_005918)  
*PRKAR1A*(NM\_002734)  
*SDHD*(NM\_003002)  
*ATM*(NM\_000051)  
*CTNNA1*(NM\_001903)  
*MEN1*(NM\_000244)  
*PRSS1*(NM\_002769)  
*SLX4*(NM\_032444)  
*ATR*(NM\_001184)  
*DICER1*(NM\_177438)  
*MET*(NM\_001127500)  
*PTCH1*(NM\_000264)  
*SMAD4*(NM\_005359)  
*AXIN2*(NM\_004655)  
*EPAS1*(NM\_001430)  
*MLH1*(NM\_000249)  
*PTEN*(NM\_000314)  
*SMARCA4*(NM\_001128849)  
*BAP1*(NM\_004656)  
*EPCAM*(NM\_002354)  
*MLH3*(NM\_001040108)  
*RAD50*(NM\_005732)  
*SMARCB1*(NM\_003073)  
*BARD1*(NM\_000465)  
*EXT1*(NM\_000127)  
*MRE11A*(NM\_005590)  
*RAD51C*(NM\_058216)  
*SPINK1*(NM\_003122)  
*BLM*(NM\_000057)  
*EXT2*(NM\_000401)  
*MSH2*(NM\_000251)  
*RAD51D*(NM\_002878)  
*STK11*(NM\_000455)  
*BMPR1A*(NM\_004329)  
*FAM175A*(NM\_139076)  
*MSH3*(NM\_002439)  
*RB1*(NM\_000321)  
*SUFU*(NM\_016169)

*BRCA1*(NM\_007294)  
*FANCA*(NM\_000135)  
*MSH6*(NM\_000179)  
*RECQL4*(NM\_004260)  
*TERT*(NM\_198253)  
*BRCA2*(NM\_000059)  
*FANCC*(NM\_000136)  
*MUTYH*(NM\_001128425)  
*RET*(NM\_020630)  
*TMEM127*(NM\_017849)  
*BRIP1*(NM\_032043)  
*FANCG*(NM\_004629)  
*NBN*(NM\_002485)  
*RHBDF2*(NM\_024599)  
*TP53*(NM\_000546)  
*CDC73*(NM\_024529)  
*FH*(NM\_000143)  
*NF1*(NM\_000267)  
*RINT1*(NM\_021930)  
*TSC1*(NM\_000368)  
*CDH1*(NM\_004360)  
*FLCN*(NM\_144997)  
*NF2*(NM\_000268)  
*RNF43*(NM\_017763)  
*TSC2*(NM\_000548)  
*CDK12*(NM\_016507)  
*GALNT12*(NM\_024642)  
*NTHL1*(NM\_002528)  
*RPS20*(NM\_001023)  
*VHL*(NM\_000551)  
*CDK4*(NM\_000075)  
*GEN1*(NM\_182625)  
*PALB2*(NM\_024675)  
*SDHA*(NM\_004168)  
*XRCC2*(NM\_005431)  
*CDKN1B*(NM\_004064)  
*GREM1*(NM\_013372)  
*PMS2*(NM\_000535)  
*SDHAF2*(NM\_017841)

Note: The detection of hereditary tumor-related genes covers the entire coding region and adjacent in



trons  $\pm 20$ bp, and also covers 387 related databases that have reported possible pathogenic intron and





regulatory region mutations.

Schedule 4 List of DNA Damage Repair (DDR) Related Genes  
Homologous recombination repair (HRR) pathway related genes

*ATM*(NM\_000051)  
*CHEK1* (NM\_001274)  
*FANCI*(NM\_001113378)  
*PALB2*(NM\_024675)  
*RAD52* (NM\_134424)  
*ATR* (NM\_001184)  
*CHEK2* (NM\_007194)  
*FANCL* (NM\_018062)  
*RAD50* (NM\_005732)  
*RAD54L* (NM\_003579)  
*BRCA1* (NM\_007294)  
*FANCA* (NM\_000135)  
*FANCM* (NM\_020937)  
*RAD51* (NM\_002875)  
*BARD1* (NM\_000465)  
*BRCA2* (NM\_000059)  
*FANCB* (NM\_001018113)  
*GEN1* (NM\_182625)  
*RAD51B* (NM\_002877)  
*BRIP1* (NM\_032043)  
*FANCC* (NM\_000136)  
*MRE11A* (NM\_005590)  
*RAD51C* (NM\_058216)  
*CDK12* (NM\_016507)  
*FANCG* (NM\_004629)  
*NBN* (NM\_002485)  
*RAD51D* (NM\_002878)

DNA mismatch repair (MMR) pathway related genes

*MLH1* (NM\_000249)  
*MLH3* (NM\_001040108)  
*MSH2* (NM\_000251)  
*MSH3* (NM\_002439)  
*MSH6* (NM\_000179)  
*PMS1* (NM\_000534)  
*PMS2* (NM\_000535)

Nucleotide excision repair (NER) pathway related genes

*ERCC1* (NM\_001983)  
*ERCC2* (NM\_000400)  
*ERCC3* (NM\_000122)  
*ERCC4* (NM\_005236)  
*ERCC5* (NM\_000123)  
*ERCC6* (NM\_000124)

Other DNA damage repair (DDR) related genes

*ATRIP*(NM\_130384)  
*MUTYH*(NM\_001128425)  
*PRKDC*(NM\_006904)  
*RPA4*(NM\_013347)  
*UBE2A*(NM\_003336)  
*BLM*(NM\_000057)  
*PARP1*(NM\_001618)  
*RECQL*(NM\_002907)  
*SHPRH*(NM\_173082)  
*UBE2V2*(NM\_003350)  
*CLK2*(NM\_003993)  
*POLD1*(NM\_002691)  
*RECQL4*(NM\_004260)  
*TP53*(NM\_000546)  
*WRN*(NM\_000553)  
*IDH1*(NM\_005896)  
*POLE*(NM\_006231)  
*REV3L*(NM\_002912)  
*TP53BP1*(NM\_001141979)  
*PTEN*(NM\_000314)  
*LIG4*(NM\_002312)  
*POLQ*(NM\_199420)  
*RIF1*(NM\_001177663)  
*TREX2*(NM\_080701)  
*STAG2*(NM\_001042749)

Note: DDR: DNA damage response; HRR: Homologous Recombination Repair ;MMR: DNA mismatch repair



tch repair; NER:Nucleotide excision repair.
