# Supplementary material for: Comprehensive Analysis Identifies PI3K/Akt Pathway Alternations as an Immune-Related Prognostic Biomarker in Colon Adenocarcinoma Patients Receiving Immune Checkpoint Inhibitor Treatment
Source: Hindawi journal article supplement (doi:10.1155/2022/8179799), 2022-06-06
Supplement: f1 [file 8179799.f1.zip]

|                   | PI3K/AKT signaling-MT<br>(N=26) | PI3K/AKT signaling-WT<br>(N=24) | Overall<br>(N=50) |
|-------------------|---------------------------------|---------------------------------|-------------------|
| <b>MSI Status</b> |                                 |                                 |                   |
| MSI-H             | 5 (19.2%)                       | 0 (0%)                          | 5 (10.0%)         |
| MSS/MSI-L         | 21 (80.8%)                      | 24 (100%)                       | 45 (90.0%)        |
| <b>PDL1 TPS</b>   |                                 |                                 |                   |
| TPS<1%            | 18 (69.2%)                      | 18 (75.0%)                      | 36 (72.0%)        |
| TPS=1%            | 4 (15.4%)                       | 2 (8.3%)                        | 6 (12.0%)         |
| TPS=2%            | 1 (3.8%)                        | 0 (0%)                          | 1 (2.0%)          |
| TPS=5%            | 1 (3.8%)                        | 0 (0%)                          | 1 (2.0%)          |
| Missing           | 2 (7.7%)                        | 4 (16.7%)                       | 6 (12.0%)         |
| <b>PDL1 CPS</b>   |                                 |                                 |                   |
| CPS<1%            | 13 (50.0%)                      | 17 (70.8%)                      | 30 (60.0%)        |
| CPS=1%            | 7 (26.9%)                       | 3 (12.5%)                       | 10 (20.0%)        |
| CPS=2%            | 2 (7.7%)                        | 0 (0%)                          | 2 (4.0%)          |
| CPS=3%            | 1 (3.8%)                        | 0 (0%)                          | 1 (2.0%)          |
| CPS=5%            | 1 (3.8%)                        | 0 (0%)                          | 1 (2.0%)          |
| Missing           | 2 (7.7%)                        | 4 (16.7%)                       | 6 (12.0%)         |
| <b>TMB</b>        |                                 |                                 |                   |
| Mean (SD)         | 18.6 (28.0)                     | 2.88 (1.73)                     | 11.1 (21.6)       |
| Median [Min, Max] | 5.59 [0, 99.3]                  | 3.29 [0, 5.92]                  | 3.95 [0, 99.3]    |
