# Supplementary material for: Comprehensive Analysis Identifies PI3K/Akt Pathway Alternations as an Immune-Related Prognostic Biomarker in Colon Adenocarcinoma Patients Receiving Immune Checkpoint Inhibitor Treatment
Source: J Immunol Res. 2022 Jun 6;2022:8179799. doi: 10.1155/2022/8179799 (PMC9192307; doi:10.1155/2022/8179799)
Supplement: Supplementary Materials — Supplementary Figure 1: mutual exclusion analysis of the top 20 mutant genes in the immunotherapy cohort (a) and TCGA cohort (b) (∗P < 0.05; ∗∗P < 0.01; ∗∗∗P < 0.001; ∗∗∗∗P < 0.0001; Fisher's exact test). Table S1: the immunogenic characteristics of patients in Local-COAD. Table S2: the list of detected genes in targeted sequencing. [file 8179799.f1.zip]

Archive with 4 entries (4 files):
- Supplementary Figure1 (1).pdf
- Supplementary Method.docx
- Table S1.pdf
- Table S2.pdf
