# Supplementary figures and images for: Comprehensive Analysis Identifies PI3K/Akt Pathway Alternations as an Immune-Related Prognostic Biomarker in Colon Adenocarcinoma Patients Receiving Immune Checkpoint Inhibitor Treatment
Source: Hindawi journal article supplement (doi:10.1155/2022/8179799), 2022-06-06

**A**

ICI-treated

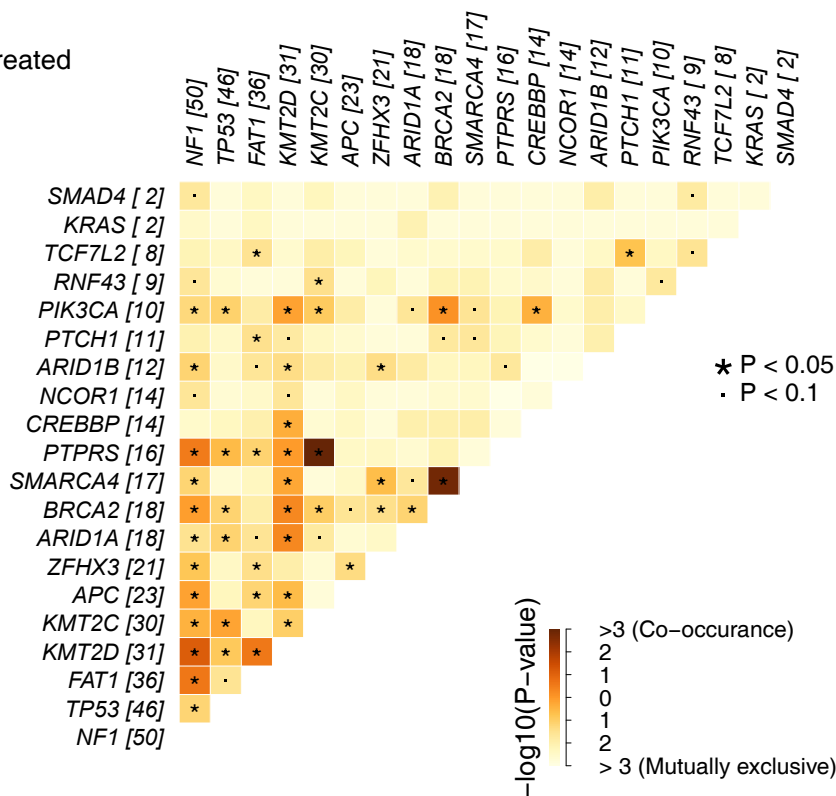**B**

TCGA-COAD

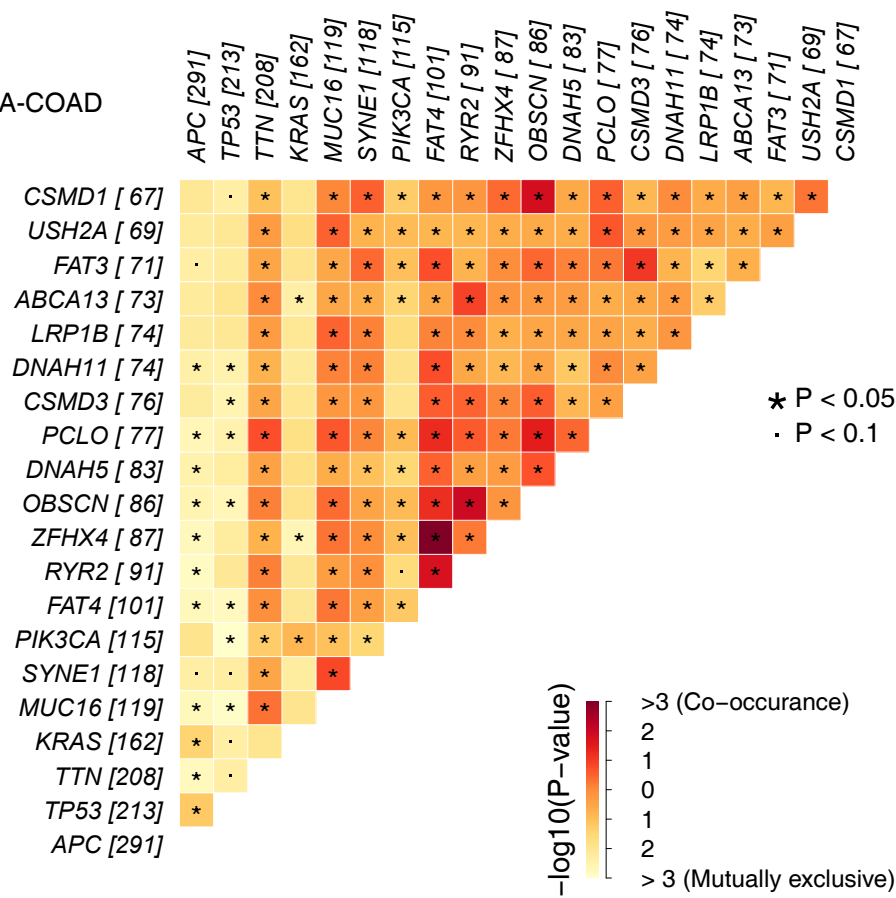

Supplement: f1 [file 8179799.f1.zip]
